# Supplementary material for: Prediction of Lung Function in Adolescence Using Epigenetic Aging: A Machine Learning Approach
Source: MDPI journal article supplement (doi:10.3390/mps3040077), 2020-11-09
Supplement: s1 [file s1]

**Supplementary materials:** Prediction of lung function in adolescence using epigenetic aging: a machine learning approach

**Table S1.** Features selected from Recursive Feature Elimination (RFE) method.

| Features               | Ranking |
|------------------------|---------|
| Sex                    | 1       |
| AA                     | 1       |
| AA <sub>res</sub>      | 4       |
| IEAA                   | 3       |
| Eczema                 | 7       |
| Hayfever               | 6       |
| Weight                 | 1       |
| FEV <sub>1</sub> at 10 | 1       |
| BMI                    | 1       |
| Smoker                 | 2       |
| Height                 | 1       |
| Asthma                 | 5       |

Here, AA = age acceleration, AA<sub>res</sub> = age acceleration residual, IEAA = Intrinsic Epigenetic Age Acceleration

**Table S2.** Summary of the variables IOWBC 10- and 18-year matched samples.

| Features                 | Age 10        | Age 18        |
|--------------------------|---------------|---------------|
| FEV <sub>1</sub>         | 2.04 ± 0.29   | 4.151±0.786   |
| Female (%)               | 43.25         | same          |
| Height (cm)              | 139.07 ± 6.19 | 171.71 ± 9.39 |
| Weight (kg)              | 35.22 ± 7.56  | 69.01 ± 14.25 |
| BMI (kg/m <sup>2</sup> ) | 18.10 ± 2.98  | 23.32 ± 4.58  |
| Ever asthma              | 63 (19.33)    | 94 (28.83)    |
| Eczema                   | 81 (24.85)    | 61 (18.71)    |
| Hay fever                | 65 (19.94)    | 109 (33.46)   |
| AA                       | 19.10 ± 7.98  | 8.25 ± 8.26   |
| AA <sub>res</sub>        | -0.008 ± 3.99 | -0.06 ± 3.78  |
| IEAA                     | -0.007 ± 3.90 | -0.07 ± 3.49  |

Data are presented as n (%) for categorical and mean ± SD for continuous variables.

**Table S3.** Mutual information regression scores for predicting FEV1 and FVC at 18 years

| Features          | FEV1   | FVC    |
|-------------------|--------|--------|
| Sex               | 0.4243 | 0.4015 |
| AA                | 0.0443 | 0.0292 |
| AA <sub>res</sub> | 0.0277 | 0      |
| IEAA              | 0.0021 | 0      |
| Eczema            | 0      | 0.0314 |
| Hayfever          | 0.0364 | 0      |
| Weight            | 0.114  | 0.1257 |
| FEV1_10           | 0.2452 | 0.2097 |
| BMI               | 0.0434 | 0.0046 |
| Smoking           | 0.0253 | 0      |
| Height            | 0.4675 | 0.5735 |
| Asthma            | 0.0237 | 0      |

**Table S4.** Results of five regression models predicting FEV<sub>1</sub> using best features and AAs

| Added feature     | Regression model      | R <sup>2</sup> | RMSE             |
|-------------------|-----------------------|----------------|------------------|
| AA                | Linear                | 74.91 ± 8.28   | 0.3782 ± 0.0720  |
|                   | Lasso                 | 74.90 ± 8.26   | 0.3784 ± 0.0719  |
|                   | ( $\alpha = 0.0001$ ) |                |                  |
|                   | Ridge                 | 74.96 ± 8.16   | 0.3782 ± 0.0716  |
|                   | ( $\alpha = 0.4$ )    |                |                  |
|                   | Elastic Net           | 74.91 ± 8.17   | 0.3785 ± 0.0714  |
|                   | ( $\alpha = 0.001$ )  |                |                  |
|                   | Bayesian Ridge        | 74.93 ± 8.23   | 0.3782 ± 0.0718  |
| AA <sub>res</sub> | Linear                | 74.81 ± 7.88   | 0.3793 ± 0.0683  |
|                   | Lasso                 | 74.83 ± 7.80   | 0.3793 ± 0.0682  |
|                   | ( $\alpha = 0.0001$ ) |                |                  |
|                   | Ridge                 | 74.87 ± 7.79   | 0.3790 ± 0.0683  |
|                   | ( $\alpha = 0.4$ )    |                |                  |
|                   | Elastic Net           | 74.81 ± 7.87   | 0.3793 ± 0.0680  |
|                   | ( $\alpha = 0.001$ )  |                |                  |
|                   | Bayesian Ridge        | 74.84 ± 7.84   | 0.3791 ± 0.0683  |
| IEAA              | Linear                | 74.77 ± 7.81   | 0.3796 ± -0.0673 |
|                   | Lasso                 | 74.77 ± 7.81   | 0.3796 ± 0.0673  |
|                   | ( $\alpha = 0.0001$ ) |                |                  |
|                   | Ridge                 | 74.83 ± 7.72   | 0.3793 ± 0.0673  |
|                   | ( $\alpha = 0.4$ )    |                |                  |
|                   | Elastic Net           | 74.79 ± 7.73   | 0.3796 ± 0.0670  |
|                   | ( $\alpha = 0.001$ )  |                |                  |
|                   | Bayesian Ridge        | 74.8 ± 7.77    | 0.3794 ± 0.0673  |

The models were developed using best four features (height, sex, weight at age 18 and FEV<sub>1</sub> at age 10) with AAs (AA, AA<sub>res</sub>, and IEAA respectively) as predictors of FEV<sub>1</sub>. Here, R<sup>2</sup> = average goodness-of-fit measure for regression models represented as percentage and RMSE = average root mean square error

**Table S5.** Results of five regression models predicting FEV<sub>1</sub> using best features and AA<sub>resdiff</sub> and IEAA<sub>diff</sub>

| Added feature         | Regression model      | R <sup>2</sup> | RMSE             |
|-----------------------|-----------------------|----------------|------------------|
| AA <sub>resdiff</sub> | Linear                | 74.85 ± 7.46   | 0.3792 ± 0.0644  |
|                       | Lasso                 | 74.86 ± 7.45   | 0.3792 ± 0.0644) |
|                       | ( $\alpha = 0.0001$ ) |                |                  |
|                       | Ridge                 | 74.90 ± 7.38   | 0.3790 ± 0.0646) |
|                       | ( $\alpha = 0.4$ )    |                |                  |
|                       | Elastic Net           | 74.90 ± 7.40   | 0.3789 ± 0.0643) |
|                       | ( $\alpha = 0.001$ )  |                |                  |
|                       | Bayesian Ridge        | 74.88 ± 7.43   | 0.3791 ± 0.0645  |
| IEAA <sub>diff</sub>  | Linear                | 74.83 ± 7.53   | 0.3793 ± 0.0647  |
|                       | Lasso                 | 74.83 ± 7.52   | 0.3792 ± 0.0646  |
|                       | ( $\alpha = 0.0001$ ) |                |                  |
|                       | Ridge                 | 74.88 ± 7.44   | 0.3791 ± 0.0648  |
|                       | ( $\alpha = 0.4$ )    |                |                  |
|                       | Elastic Net           | 74.87 ± 7.46   | 0.3791 ± 0.0646  |

( $\alpha = 0.001$ )  
Bayesian Ridge                       $74.86 \pm 7.49$                        $0.3791 \pm 0.0647$

The models were developed using best four features (height, sex, weight at age 18 and FEV1 at age 10) with  $AA_{resdiff}$  and  $IEAA_{diff}$  respectively as predictors of FEV1. Here,  $AA_{resdiff} = AA_{res}$  at 18 –  $AA_{res}$  at 10,  $IEAA_{diff} = IEAA$  at 18 –  $IEAA$  at 10,  $R^2$  = average goodness-of-fit measure for regression models represented as percentage and RMSE = average root mean square error

**Table S6.** Results of five regression models predicting FVC using best features and AAs

| Added feature | Regression model                     | $R^2$             | RMSE                |
|---------------|--------------------------------------|-------------------|---------------------|
| AA            | Linear                               |                   |                     |
|               |                                      | $74.85 \pm 7.69$  | $0.4485 \pm 0.0729$ |
|               | Lasso<br>( $\alpha = 0.0001$ )       | $74.87 \pm 07.66$ | $0.4484 \pm 0.0727$ |
|               | Ridge<br>( $\alpha = 0.4$ )          | $74.87 \pm 7.60$  | $0.4486 \pm 0.0722$ |
|               | Elastic Net<br>( $\alpha = 0.0025$ ) | $75.04 \pm 7.32$  | $0.4475 \pm 0.0711$ |
|               | Bayesian Ridge                       | $74.87 \pm 07.66$ | $0.4485 \pm 0.0726$ |
| $AA_{res}$    | Linear                               |                   |                     |
|               |                                      | $75.10 \pm 7.30$  | $0.4467 \pm 0.0701$ |
|               | Lasso<br>( $\alpha = 0.0001$ )       | $75.12 \pm 7.28$  | $0.4466 \pm 0.0700$ |
|               | Ridge<br>( $\alpha = 0.4$ )          | $75.11 \pm 7.21$  | $0.4469 \pm 0.0693$ |
|               | Elastic Net<br>( $\alpha = 0.0025$ ) | $75.24 \pm .0701$ | $0.4460 \pm 0.0687$ |
|               | Bayesian Ridge                       | $75.12 \pm .0726$ | $0.4467 \pm 0.0698$ |
| IEAA          | Linear                               |                   |                     |
|               |                                      | $75.01 \pm .0741$ | $0.4475 \pm 0.0706$ |
|               | Lasso<br>( $\alpha = 0.0001$ )       | $75.02 \pm .0738$ | $0.4473 \pm 0.0704$ |
|               | Ridge<br>( $\alpha = 0.4$ )          | $75.02 \pm .0732$ | $0.4476 \pm 0.0698$ |
|               | Elastic Net<br>( $\alpha = 0.0025$ ) | $75.18 \pm .0708$ | $0.4464 \pm 0.0689$ |
|               | Bayesian Ridge                       | $75.02 \pm .0737$ | $0.4474 \pm 0.0703$ |

The models were developed using best four features (height, sex, weight at age 18 and FVC at age 10) with AAs (AA,  $AA_{res}$ , and IEAA respectively) as predictors of FVC. Here,  $R^2$  = average goodness-of-fit measure for regression models represented as percentage and RMSE = average root mean square error

**Table S7.** Results of five regression models predicting FVC using best features and  $AA_{resdiff}$  and  $IEAA_{diff}$

| Added feature  | Regression model                     | $R^2$             | RMSE                |
|----------------|--------------------------------------|-------------------|---------------------|
| $AA_{resdiff}$ | Linear                               | $75.13 \pm .0703$ | $0.4467 \pm 0.0668$ |
|                | Lasso<br>( $\alpha = 0.0001$ )       | $75.14 \pm .0703$ | $0.4466 \pm 0.0669$ |
|                | Ridge<br>( $\alpha = 0.4$ )          | $75.13 \pm .0696$ | $0.4469 \pm 0.0662$ |
|                | Elastic Net<br>( $\alpha = 0.0025$ ) | $75.23 \pm .0689$ | $0.4461 \pm 0.0669$ |
|                | Bayesian Ridge                       | $75.14 \pm .0700$ | $0.4467 \pm 0.0666$ |
|                |                                      |                   |                     |
| $IEAA_{diff}$  | Linear                               | $75.26 \pm .0685$ | $0.4458 \pm 0.0659$ |
|                | Lasso<br>( $\alpha = 0.0001$ )       | $75.27 \pm .0685$ | $0.4457 \pm 0.0660$ |
|                | Ridge<br>( $\alpha = 0.4$ )          | $75.25 \pm .0677$ | $0.4460 \pm 0.0653$ |
|                | Elastic Net<br>( $\alpha = 0.0025$ ) | $75.32 \pm .0677$ | $0.4455 \pm 0.0660$ |
|                | Bayesian Ridge                       | $75.27 \pm .0682$ | $0.4457 \pm 0.0656$ |
|                |                                      |                   |                     |

The models were developed using best four features (height, sex, weight at age 18 and FVC at age 10) with  $AA_{resdiff}$  and  $IEAA_{diff}$  respectively as predictors of FVC. Here,  $AA_{resdiff} = AA_{res}$  at 18 –  $AA_{res}$  at 10,  $IEAA_{diff} = IEAA$  at 18 –  $IEAA$  at 10,  $R^2$  = average goodness-of-fit measure for regression models represented as percentage and RMSE = average root mean square error

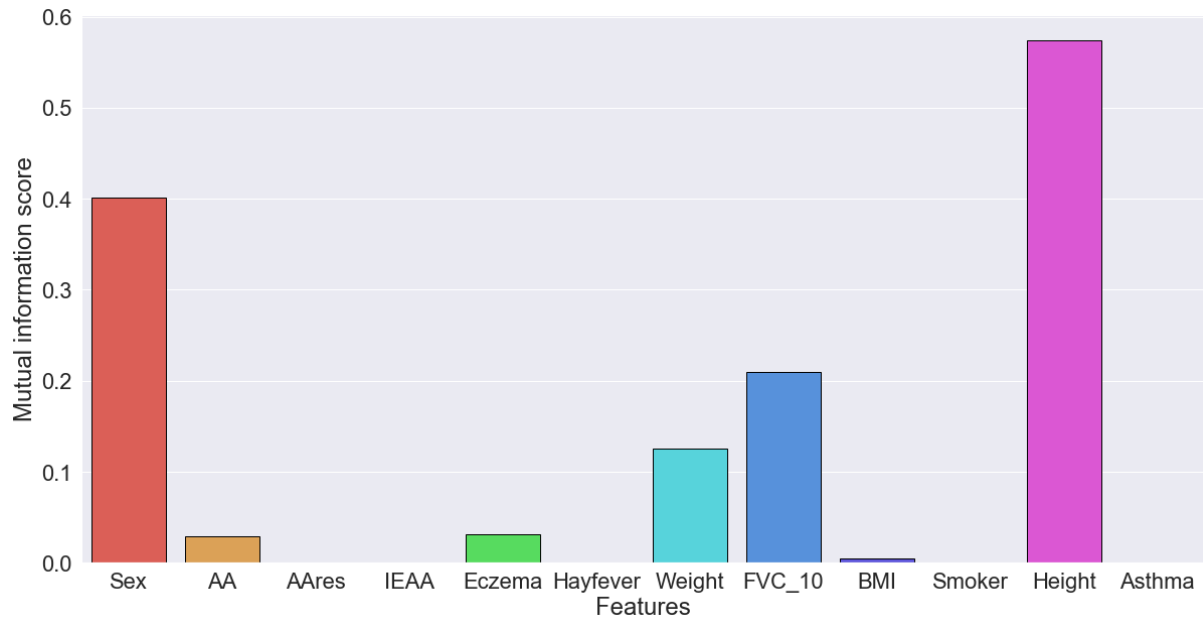

**Figure S1.** Mutual information score between each feature and the target which is FVC at age 18. Association of height and gender with FVC is higher than any of the other features.
